# Supplementary material for: Ionothermal synthesis of two oxalate-bridged lanthanide(iii) chains with slow magnetization relaxation by using a deep eutectic solvent
Source: Royal Society of Chemistry journal article supplement (doi:10.1039/c3dt51816g), 2013-01-01
Supplement: c3dt51816g.pdf [file c3dt51816g.pdf]

*Supporting Information*

**Ionothermal synthesis of two oxalate-bridged lanthanide(III) chains with slow magnetization relaxation by using deep eutectic solvent**

Yan-Meng, Jun-Liang Liu, Ze-Min Zhang, Wei-Quan Lin, Zhuo-Jia Lin and Ming-Liang Tong\*

*MOE Key Laboratory of Bioinorganic and Synthetic Chemistry / State Key Laboratory of Optoelectronic Materials and Technologies, School of Chemistry and Chemical Engineering, Sun Yat-Sen University, Guangzhou 510275, China. E-mail: [tongml@mail.sysu.edu.cn](mailto:tongml@mail.sysu.edu.cn)*

## Experimental details

**General Remarks:** The reagents for the synthesis were commercially available and used as purchased without further purification. The C, H and N microanalyses were carried out with an Elementar Vario-EL CHNS elemental analyzer. The FT-IR spectra were recorded from KBr pellets in the range 4000-400  $\text{cm}^{-1}$  on a Bio-Rad FTS-7 spectrometer. Powder X-ray diffraction measurements have been obtained on Bruker D8 Advance Diffractometer (Cu-K $\alpha$ ,  $\lambda = 1.54056 \text{ \AA}$ ) by scanning over the range of 5-50° with a step of 0.12 °/s at 293 K. Simulated powder XRD patterns were calculated with Mercury. Magnetic susceptibility Data was measured by a Quantum Design MPMS-XL7 SQUID. Data were corrected for the diamagnetic contribution calculated from Pascal constants.

**Synthesis of 1:** A mixture of DyCl<sub>3</sub>·6H<sub>2</sub>O (0.263 g, 0.7 mmol), Choline Chloride (0.267 g, 2 mmol) and Oxalic acid dehydrate (0.265g, 2 mmol) were sealed in a 20 mL Teflon-lined autoclave and heated at 120 °C for 3 days. Colorless transparent needle-shaped crystals were washed by methanol, dried in air and recovered with 57% (based on Dy). IR (KBr,  $\text{cm}^{-1}$ ): 3448(br, vs), 3390(br), 3328(br), 3170(br, vs), 2246(w), 2165(w), 2069(w), 1643(vs), 1465, 1390(vs), 1311(vs), 1267(s), 1164(m), 1116(m), 1085(m), 1039(w), 966(w), 921, 788(s), 671(s), 632(m), 553(m), 512(w), 460(w). Elemental analyses (calc: found) for **1**: C 16.89 : 16.95, H 4.46 : 4.34, N 2.81 : 2.78.

**Synthesis of 2:** The procedure was the same as that employed for **1**, except that ErCl<sub>3</sub>·6H<sub>2</sub>O (0.267 g, 0.7 mmol) was employed as lanthanide salts. The pink needle-shaped crystals were obtained (yield 51 % based on Er). IR (KBr,  $\text{cm}^{-1}$ ): 3450(br, vs), 3386(br), 3318(br), 3167(br, vs), 2290, 2188, 2081, 1910, 1625(vs), 1469, 1390(vs), 1317(vs), 1270(s), 1159(m), 1118(m), 1089(m), 1039(w), 971(w), 946, 916, 788(s), 671(s), 619(m), 551(m), 512(w), 468(w). Elemental analyses (calc: found) for **2**: C 16.73 : 16.73, H 4.41 : 4.31, N 2.79 : 2.49.

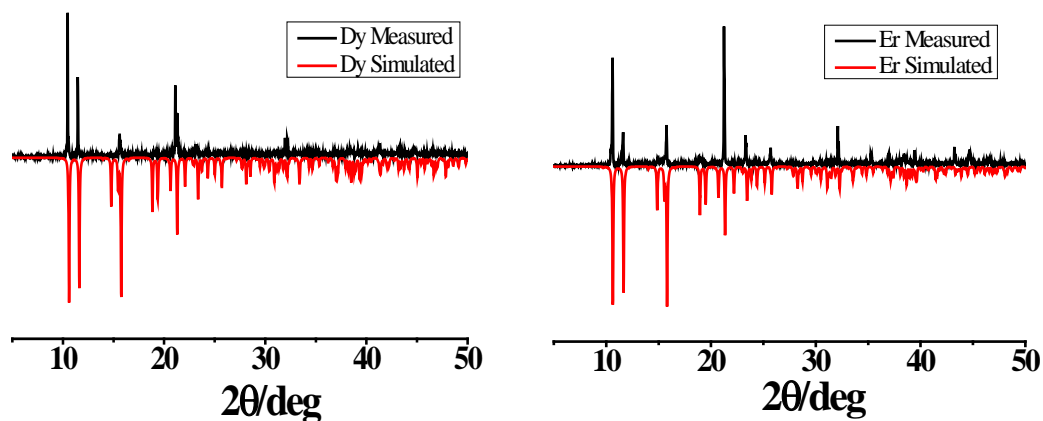

**Fig. S1** Powder X-ray diffraction patterns of compounds **1** (left) and **2** (right).

Crystal data for **1**:  $C_7H_{22}DyNO_9Cl_2$ ,  $M = 497.66$ , Monoclinic, space group  $P2_1/n$ ,  $a = 9.118(2)$ ,  $b = 15.223(4)$ ,  $c = 12.154(3)$  Å,  $\alpha = 90^\circ$ ,  $\beta = 109.432(5)^\circ$ ,  $\gamma = 90^\circ$ ,  $V = 1590.9(7)$  Å<sup>3</sup>,  $T = 150(2)$  K,  $Z = 4$ ,  $\rho_c = 2.078$  g cm<sup>-3</sup>,  $F(000) = 972$ , 3395 reflections collected, 2560 reflections used ( $R_{int} = 0.0423$ ),  $R_1 = 0.0585$  ( $I > 2\sigma(I)$ ),  $wR_2 = 0.1117$  (all data). For **2**:  $C_7H_{22}ErNO_9Cl_2$ ,  $M = 502.42$ , Monoclinic, space group  $P2_1/n$ ,  $a = 9.0957(2)$ ,  $b = 15.1667(3)$ ,  $c = 12.0825(3)$  Å,  $\alpha = 90^\circ$ ,  $\beta = 109.627(2)^\circ$ ,  $\gamma = 90^\circ$ ,  $V = 1569.96(6)$  Å<sup>3</sup>,  $T = 150(2)$  K,  $Z = 4$ ,  $\rho_c = 2.126$  g cm<sup>-3</sup>,  $F(000) = 980$ , 2355 reflections collected, 2141 reflections used ( $R_{int} = 0.0284$ ),  $R_1 = 0.0396$  ( $I > 2\sigma(I)$ ),  $wR_2 = 0.0769$  (all data). Diffraction data for **1** were recorded on a Rigaku R-Axis SPIDER Image Plate diffractometer with graphite-monochromated Mo-K $\alpha$  ( $\lambda = 0.71073$  Å) radiation at 150(2) K. Diffraction data for **2** were carried out with the Oxford-Diffraction Xcalibur CCD diffractometer using graphite-monochromated Cu-K $\alpha$  radiation ( $\lambda = 1.54178$  Å) at 150(2) K.

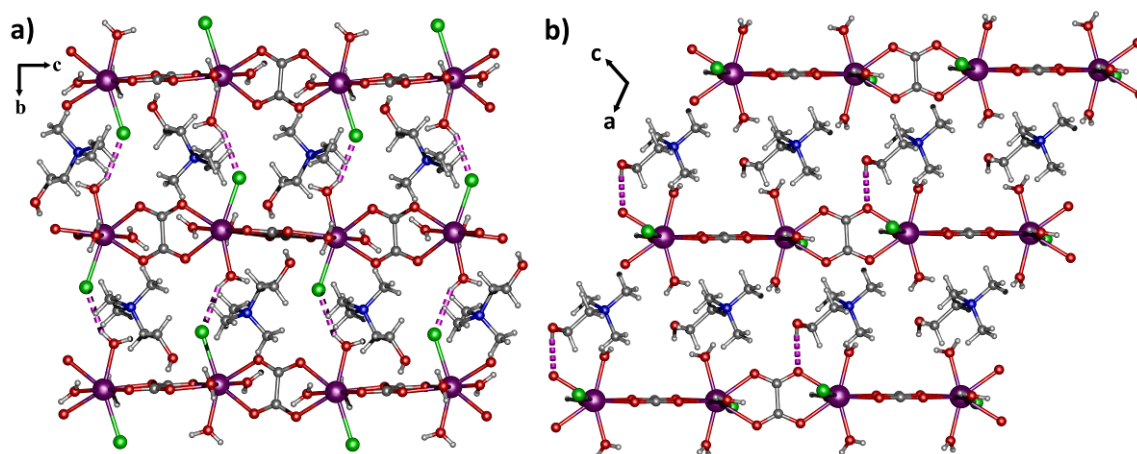

**Fig. S2** Ball and stick plots from viewpoints along the  $a$  axis (a) and the  $b$  axis (b). Hydrogen bonds are represented by pink dashed line.

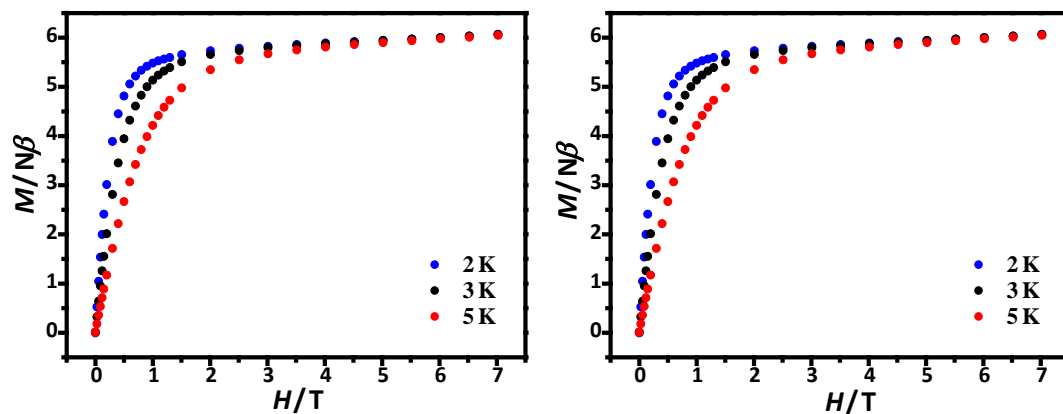

**Fig. S3** Field-dependence of the magnetization at the indicated temperatures for **1** (left) and **2** (right).

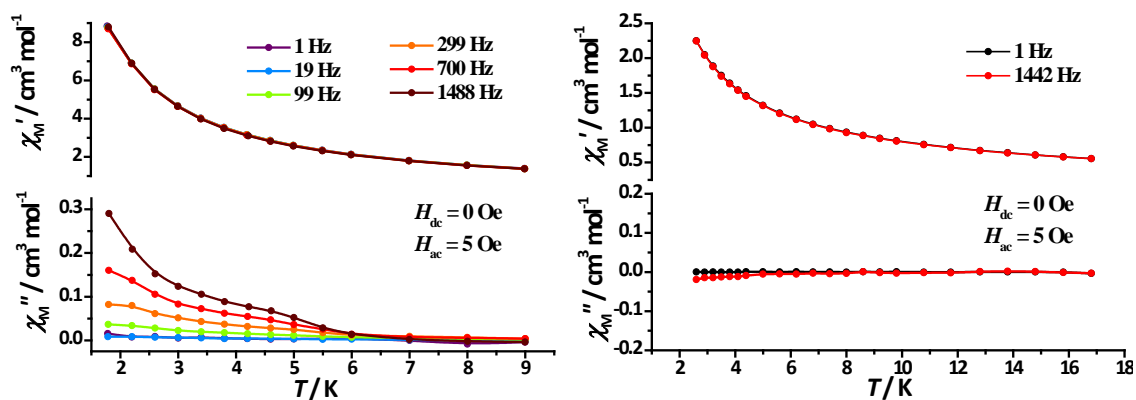

Fig. S4 Temperature-dependence of in-phase ( $\chi_M'$ ) and out-of-phase ( $\chi_M''$ ) ac susceptibility signals ( $H_{dc} = 0 \text{ Oe}$ ,  $H_{ac} = 5 \text{ Oe}$ ) at the indicated frequencies for **1** (left) and **2** (right).

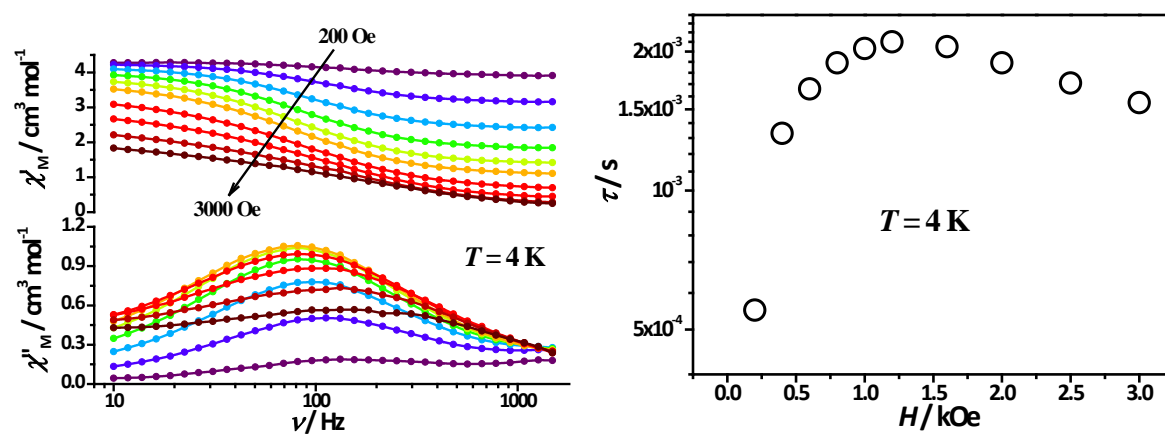

Fig. S5 Left: Plot of ac susceptibility vs frequency ( $\nu$ ) in the applied fields of 200-3000 Oe at 4 K for **1**; Right: dc field dependence of the relaxation time at 4 K.

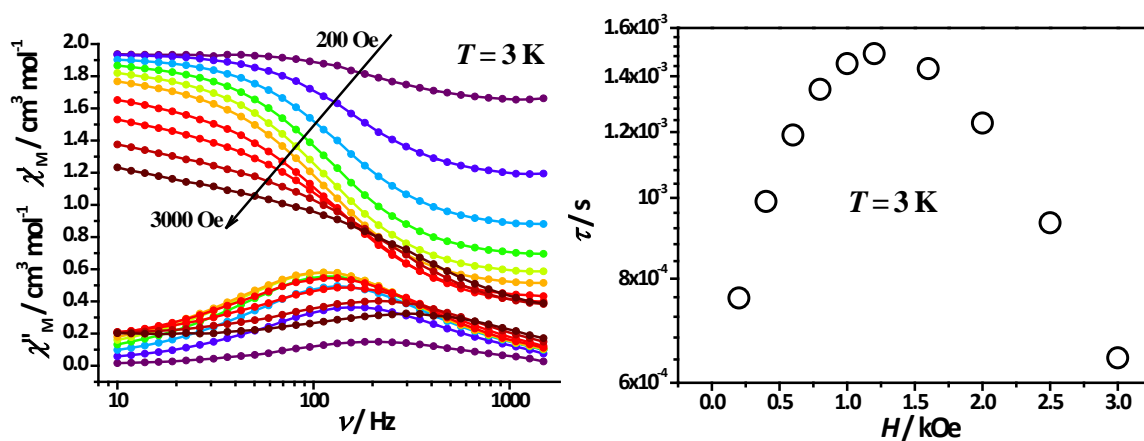

Fig. S6 Left: Plot of ac susceptibility vs frequency ( $\nu$ ) in the applied fields of 200-3000 Oe at 3 K for **2**; Right: dc field dependence of the relaxation time at 3 K.

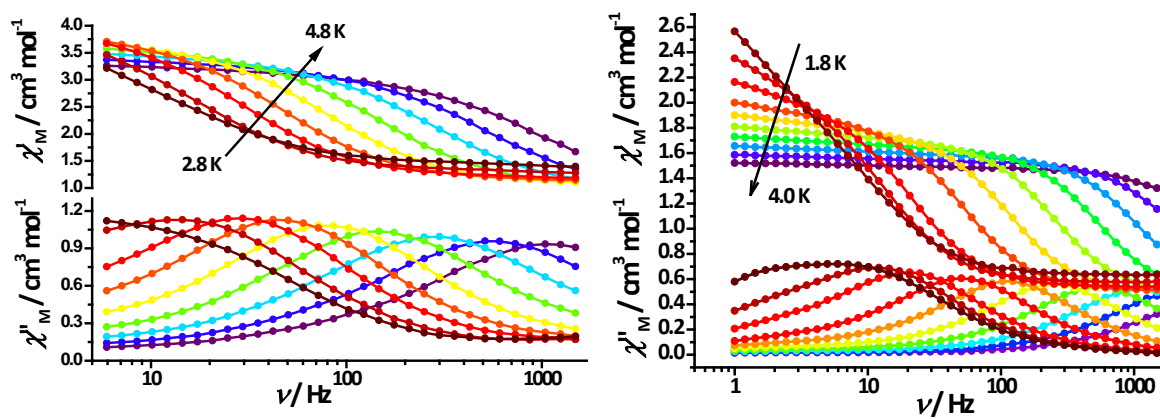

**Fig. S7** Frequency-dependence of ac susceptibility signals ( $H_{\text{dc}} = 1200$  Oe,  $H_{\text{ac}} = 5$  Oe) in the temperature range of 2.8-4.8 K for **1** (right) and 1.8-4.0 K for **2** (left).
